# Supplementary material for: Comparative transcriptomic analyses of chlorogenic acid and luteolosides biosynthesis pathways at different flowering stages of diploid and tetraploid Lonicera japonica
Source: PeerJ. 2020 Mar 6;8:e8690. doi: 10.7717/peerj.8690 (PMC7061910; doi:10.7717/peerj.8690)
Supplement: Supplemental Information 1 [file peerj-08-8690-s001.xlsx]

## Sheet: ST1
Table ST1 Sample sequencing data evaluation statistical table
Sample name	Sample ID	Read Number	Base Number	GC Content	%≥Q30
2n S3	T01	21185862	6264237648	0.4512	0.8901
2n S3	T02	22824584	6743522558	0.4529	0.8857
2n S4	T03	20850269	6178497014	0.4515	0.8847
2n S4	T04	21963465	6501274736	0.4539	0.8756
2n S5	T05	25942718	7664228320	0.4538	0.8846
2n S6	T09	20894479	6174893230	0.4544	0.8827
2n S3	T10	21884335	6474737146	0.4506	0.884
2n S4	T11	24382013	7218628378	0.4515	0.882
2n S5	T12	22496209	6645145114	0.4549	0.8701
4n S3	T13	28276750	8364794896	0.4526	0.8836
4n S4	T14	21842801	6458657298	0.4574	0.9028
4n S3	T17	20335211	6019374254	0.4528	0.8897
4n S4	T18	21120313	6246658854	0.4553	0.8873
4n S6	T20	31095947	9032231142	0.4531	0.9039
4n S3	T21	23061794	6713853552	0.4453	0.9037
4n S5	T22	21614524	6307786496	0.4436	0.9071
4n S6	T23	22708368	6645909008	0.4482	0.9025
4n S4	T24	21262116	6226048816	0.4477	0.9017
2n S5	T25	24851164	7377320098	0.4482	0.9394
2n S6	T26	26829588	7988425922	0.4438	0.9402
4n S5	T27	25074370	7457887218	0.4474	0.9366
4n S6	T28	30107773	8941740906	0.4454	0.9392
4n S5	T30	29563096	8773971938	0.4456	0.9409
2n S6	T31	39991866	11897347402	0.4474	0.9411

## Sheet: ST2
Table ST2 Statistical table for comparison of sequencing data and assembly results
Sample ID	Clean Reads	Mapped Reads	Mapped Ratio
T01	21185862	15653602	0.7389
T02	22824584	16940391	0.7422
T03	20850269	15464881	0.7417
T04	21963465	16296874	0.742
T05	25942718	19246364	0.7419
T09	20894479	15491601	0.7414
T10	21884335	16294646	0.7446
T11	24382013	18109284	0.7427
T12	22496209	16374941	0.7279
T13	28276750	20954869	0.7411
T14	21842801	16139966	0.7389
T17	20335211	15262898	0.7506
T18	21120313	15531864	0.7354
T20	31095947	22468905	0.7226
T21	23061794	17054370	0.7395
T22	21614524	15753610	0.7288
T23	22708368	16769369	0.7385
T24	21262116	15852319	0.7456
T25	24851164	16018050	0.6446
T26	26829588	17768500	0.6623
T27	25074370	16686053	0.6655
T28	30107773	20242520	0.6723
T30	29563096	20125981	0.6808
T31	39991866	27401886	0.6852

## Sheet: ST3
Table ST3 Unigene annotation
#Anno_Database	Annotated_Number	300<=length<1000	length>=1000
GO_Annotation	24567	8857	12027	0.279778
Pfam_Annotation	30591	9992	17031	0.348381
eggNOG_Annotation	40641	14070	20249	0.462834
nr_Annotation	41009	14498	20541	0.467025
KOG_Annotation	25563	8984	13077	0.291121
COG_Annotation	19651	6267	10237	0.223793
KEGG_Annotation	33566	11833	17627	0.382261
Swissprot_Annotation	36612	13106	18515	0.41695
All_Annotated	45633	16449	21228	0.519685

## Sheet: ST4
Table ST4 The unigenes Num gt 0 at Six stages
	Num of FPKM>0	Total unigenes87809
2n S3	T01_FPKM	45013
	T02_FPKM	43143
	T10_FPKM	43514
4n S3	T13_FPKM	41518
	T17_FPKM	38200
	T21_FPKM	42249
2n S4	T03_FPKM	38656
	T04_FPKM	36783
	T11_FPKM	38104
4n S4	T14_FPKM	36968
	T18_FPKM	35183
	T24_FPKM	41268
2n S5	T05_FPKM	43695
	T12_FPKM	41163
	T25_FPKM	42314
4n S5	T22_FPKM	40774
	T27_FPKM	38024
	T30_FPKM	38129
2n S6	T09_FPKM	40896
	T26_FPKM	39929
	T31_FPKM	42423
4n S6	T20_FPKM	44206
	T23_FPKM	41413
	T28_FPKM	36616

## Sheet: ST5
Table ST5 Statistical table of the number of differentially expressed genes
DEG_Set	All_DEG	up-regulated	down-regulated
2n_vs_4n S3	1923	401	1522
2n_vs_4n S4	666	247	419
2n_vs_4n S5	888	269	619
2n_vs_4n S6	2078	589	1489

## Sheet: ST6
Table ST6 MEP pathway genes
GGPS	c105204.graph_c0
	c105204.graph_c1
	c114259.graph_c0
	c115842.graph_c0
	c184781.graph_c0
	c46090.graph_c0
	c84472.graph_c0
	c97398.graph_c0
GES	c110969.graph_c0
	c90955.graph_c0
G10H	c116655.graph_c0
	c124342.graph_c1
	c125033.graph_c1
	c126731.graph_c0
	c127005.graph_c1
	c129341.graph_c0
	c131494.graph_c0
	c159019.graph_c0
	c202065.graph_c0
	c64785.graph_c0
	c67638.graph_c0
10HGO	c120576.graph_c0
	c120996.graph_c0
	c121001.graph_c0
	c121646.graph_c1
	c129505.graph_c0
	c46427.graph_c0
	c92046.graph_c0
IS	c109708.graph_c0
	c68771.graph_c1
IO	c116071.graph_c1
7DLGT	c101390.graph_c0
	c101390.graph_c1
	c108491.graph_c0
	c109422.graph_c0
	c111365.graph_c0
	c112723.graph_c0
	c114921.graph_c0
	c115169.graph_c0
	c117372.graph_c0
	c122203.graph_c0
	c123514.graph_c0
	c123514.graph_c1
	c125119.graph_c1
	c81627.graph_c0
	c83400.graph_c0
	c85949.graph_c0
SLS	c104525.graph_c0
	c105566.graph_c0
	c105566.graph_c1
	c114596.graph_c0
	c114596.graph_c2
	c114596.graph_c3
	c123261.graph_c1
	c127237.graph_c1
	c41221.graph_c0
	c84566.graph_c0
LAMT	c103831.graph_c0
	c119739.graph_c1
	c123216.graph_c1
DL7H	c108716.graph_c0
	c109488.graph_c0
	c111468.graph_c0
	c113571.graph_c1
	c113848.graph_c0
	c114405.graph_c0
	c114589.graph_c0
	c115911.graph_c0
	c118449.graph_c1
	c118449.graph_c3
	c122481.graph_c0
	c123912.graph_c0
	c124926.graph_c1
	c126954.graph_c1
	c131094.graph_c0
	c133614.graph_c0
	c146946.graph_c0
	c48934.graph_c0
	c65514.graph_c0
	c71909.graph_c0
	c79117.graph_c0

## Sheet: ST7
Table ST7. Statistics of SNPs and SSRs detected in Lonicera japonica
SNP					SSR
#Samples	HomoSNP	HeteSNP	AllSNP		#type	number	percentage
S3 2n	51764	44638	96402		c	1076	0.0649994
S4 2n	48483	42565	91048		c*	14	0.000845717
S5 2n	49374	42025	91399		p1	7915	0.478132
S6 2n	55261	47057	102318		p2	5133	0.310076
S3 4n	61463	41395	102858		p3	2206	0.133261
S4 4n	53685	35878	89563		p4	178	0.0107527
S5 4n	62230	42062	104292		p5	23	0.00138939
S6 4n	56804	36927	93731		p6	9	0.000543675
