# Supplementary material for: Comparative transcriptomic analyses of chlorogenic acid and luteolosides biosynthesis pathways at different flowering stages of diploid and tetraploid Lonicera japonica
Source: PeerJ. 2020 Mar 6;8:e8690. doi: 10.7717/peerj.8690 (PMC7061910; doi:10.7717/peerj.8690)
Supplement: Supplemental Information 3 [file peerj-08-8690-s003.xlsx]

## Sheet: Sheet1
chlorogenic acid							2x						4x
	2x				chlorogenic acid
	average	Standard error
S1	35.79	1.19			S1	36.09	35.37	35.91		S1	39.68	39.97	40.12
S2	36.76	1.13			S2	35.81	36.71	37.76		S2	48.88	48.18	48.38
S3	42.88	1.24			S3	43.18	42.48	42.98		S3	45.82	45.12	45.32
S4	30.535	1.15			S4	30.515	31.021	30.07		S4	37.98	36.89	37.89
S5	33.0241	1.11			S5	33.02	32.73	33.31		S5	38.87	38.07	39.97
S6	31.1917	1.12			S6	31.59	30.89	31.0917		S6	34.18	34.98	34.58
luteoloside							2x					4x
	2x
	average	Standard error		luteoside	S1	0.754	0.725	0.717		S1	0.921	0.913	0.881
S1	0.7321	0.0632			S2	1.121	0.925	1.02		S2	1.117	1.241	1.256
S2	1.0222	0.007			S3	1.3251	1.5251	1.4251		S3	1.458	1.586	1.623
S3	1.4251	0.0116			S4	1.052	1.132	1.152		S4	0.925	0.948	0.976
S4	1.1123	0.023			S5	0.857	0.913	0.864		S5	1.264	1.216	1.313
S5	0.8778	0.01			S6	0.992	1.011	0.944		S6	0.76	0.782	0.798
S6	0.9823	0.00029015
