# Supplementary material for: Comparative transcriptomic analyses of chlorogenic acid and luteolosides biosynthesis pathways at different flowering stages of diploid and tetraploid Lonicera japonica
Source: PeerJ journal article supplement (doi:10.7717/peerj.8690), 2020-03-06
Supplement: Supplementary_Material.pdf [file Supplementary_Material.pdf]

## Supplementary Material

### 1 Supplementary Figure

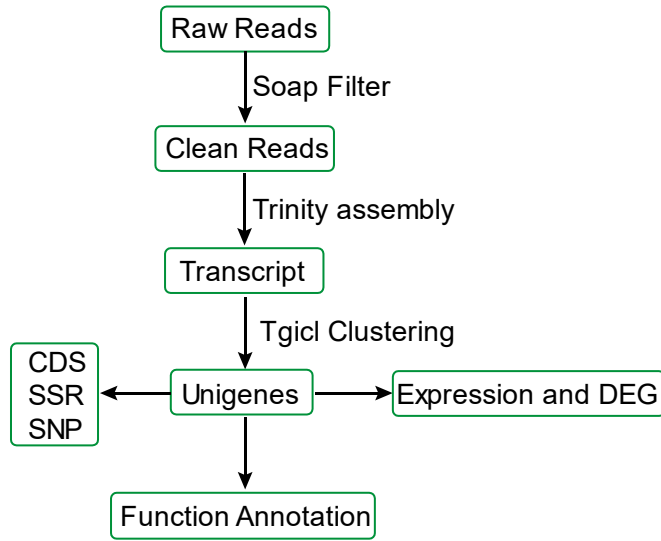

**Supplementary Figure 1.** Transcriptome analysis of *Lonicera japonica*

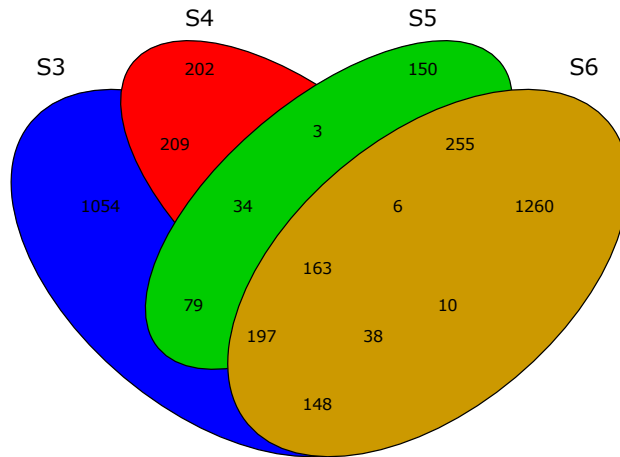

**Supplementary Figure 2.** A venn diagram showing differentially expressed unigenes among all S3-S6 growth stages of diploid and tetraploid *L. japonica*.

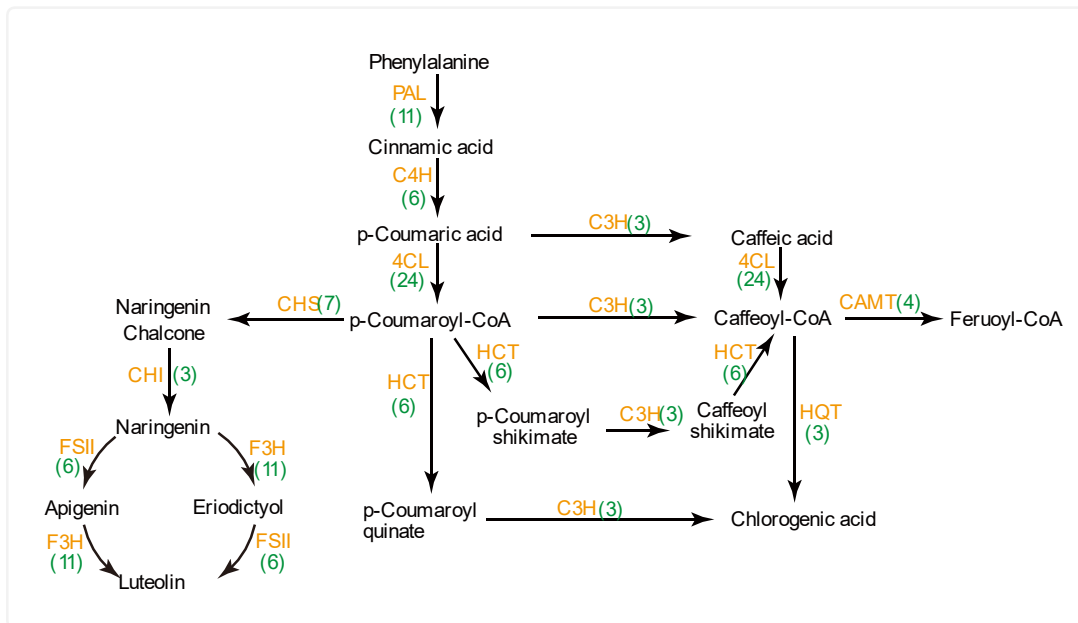

**Supplementary Figure 3.** Proposed CGA, and luteolin biosynthetic pathways in *L. japonica*. Numbers in the bracket is the identified gene copy number.

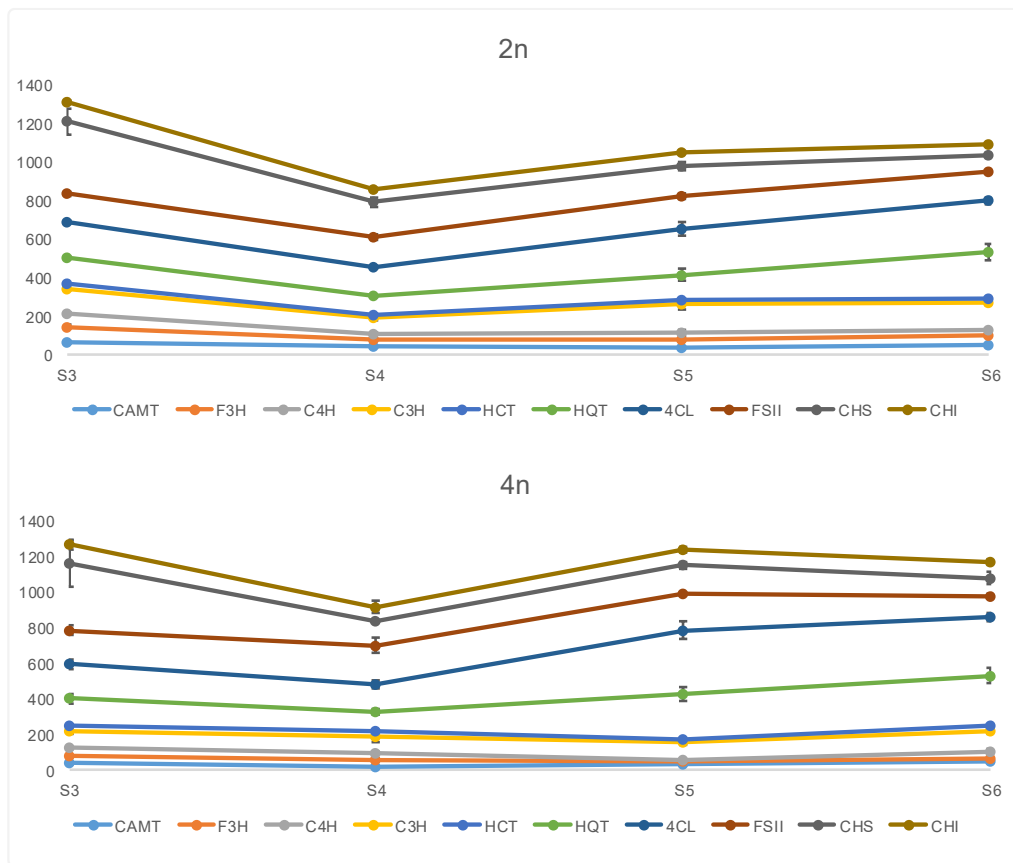

**Supplementary Figure 4.** Expression profile of unigenes involved in CGA and luteoloside biosynthesis pathways along the development of diploid and tetraploid *L. japonica*.
